# Supplementary material
Source: ML conference proceedings conference paper supplement (https://proceedings.mlr.press/v28/wen13.html)
Supplement: Supplementary file [file wen13-supp.pdf]

# Sequential Bayesian Search

## Appendices

Zheng Wen      Branislav Kveton      Brian Eriksson      Sandilya Bhamidipati

### A Proof of Theorem 1

Assume that at the beginning of game  $t$ , the system's belief in the user's preference is  $\mathbb{P}_t$ . Then, the certainty-equivalent user preference during game  $t$  is

$$\pi_t^*(i) = \mathbb{E}_{\pi \sim \mathbb{P}_t} [\pi(i)] \quad \forall i \in \mathcal{I}.$$

Recall we define  $\pi_{\min}^* = \min_{i \in \mathcal{I}} \pi^*(i)$ , Lemma A-1 formalizes the result that if  $\pi_t^*$  is “close” to  $\pi^*$ , then for any decision tree  $T$ ,  $\mathbb{E}_{i \sim \pi_t^*} [N(T, i)]$  is “close” to  $\mathbb{E}_{i \sim \pi^*} [N(T, i)]$ :

**Lemma A-1:** *For any decision tree  $T$ , we have that*

$$|\mathbb{E}_{i \sim \pi^*} [N(T, i)] - \mathbb{E}_{i \sim \pi_t^*} [N(T, i)]| \leq \frac{\|\pi^* - \pi_t^*\|_\infty}{\pi_{\min}^*} \mathbb{E}_{i \sim \pi^*} [N(T, i)]. \quad (1)$$

**Proof:**

Notice that

$$\begin{aligned} |\mathbb{E}_{i \sim \pi^*} [N(T, i)] - \mathbb{E}_{i \sim \pi_t^*} [N(T, i)]| &= \left| \sum_{i \in \mathcal{I}} [\pi^*(i) - \pi_t^*(i)] N(T, i) \right| \\ &\leq \sum_{i \in \mathcal{I}} |\pi^*(i) - \pi_t^*(i)| N(T, i) \\ &= \sum_{i \in \mathcal{I}} \frac{|\pi^*(i) - \pi_t^*(i)|}{\pi^*(i)} \pi^*(i) N(T, i) \\ &\leq \max_{i \in \mathcal{I}} \left[ \frac{|\pi^*(i) - \pi_t^*(i)|}{\pi^*(i)} \right] \sum_{i \in \mathcal{I}} \pi^*(i) N(T, i) \\ &= \max_{i \in \mathcal{I}} \left[ \frac{|\pi^*(i) - \pi_t^*(i)|}{\pi^*(i)} \right] \mathbb{E}_{i \sim \pi^*} [N(T, i)] \\ &\leq \frac{\max_{i \in \mathcal{I}} |\pi^*(i) - \pi_t^*(i)|}{\pi_{\min}^*} \mathbb{E}_{i \sim \pi^*} [N(T, i)] \\ &= \frac{\|\pi^* - \pi_t^*\|_\infty}{\pi_{\min}^*} \mathbb{E}_{i \sim \pi^*} [N(T, i)], \end{aligned}$$

where the first inequality follows from the triangular inequality and the second inequality follows from the Hölder's inequality. Q.E.D.

Note that the bound in Lemma A-1 is tight in the following example. Assume  $\mathcal{I} = \{1, 2\}$  and

$$\begin{aligned} N(T, 1) &= 0 \\ N(T, 2) &= 1 \\ \pi^*(1) &= 1 - \varepsilon \\ \pi^*(2) &= \varepsilon \\ \pi_t^*(1) &= 1 - 2\varepsilon \\ \pi_t^*(2) &= 2\varepsilon. \end{aligned}$$

Then  $\mathbb{E}_{i \sim \pi^*} [N(T, i)] = \varepsilon$ ,  $\mathbb{E}_{i \sim \pi_t^*} [N(T, i)] = 2\varepsilon$ , and therefore

$$|\mathbb{E}_{i \sim \pi^*} [N(T, i)] - \mathbb{E}_{i \sim \pi_t^*} [N(T, i)]| = \varepsilon.$$

On the other hand, we have  $\|\pi^* - \pi_t^*\|_\infty = \varepsilon$ . Furthermore, for  $\varepsilon \leq \frac{1}{2}$ , we have that

$$\pi_{\min}^* = \pi^*(2) = \varepsilon.$$

Thus we have

$$\frac{\|\pi^* - \pi_t^*\|_\infty}{\pi_{\min}^*} \mathbb{E}_{i \sim \pi^*} [N(T, i)] = \frac{\varepsilon}{\varepsilon} \varepsilon = \varepsilon.$$

Hence, the bound in Lemma A-1 is tight in this example.

Throughout this section, we assume the certainty-equivalent (CE) optimization problem is solved exactly, and use  $T_t^*$  to denote the solution of the CE optimization problem in game  $t$ ,  $\forall t = 0, 1, \dots$ . Lemma A-2 states that if  $\|\pi_t^* - \pi^*\|_\infty$  is “small”, the one-game regret (conditioning on  $\pi_t^*$ ) is also “small”:

**Lemma A-2:** *If  $\|\pi^* - \pi_t^*\|_\infty < \pi_{\min}^*$ , then we have*

$$\frac{2\|\pi^* - \pi_t^*\|_\infty}{\pi_{\min}^* - \|\pi^* - \pi_t^*\|_\infty} \mathbb{E}_{i \sim \pi^*} [N(T^*, i)] \geq \mathbb{E}_{i \sim \pi^*} [N(T_t^*, i)] - \mathbb{E}_{i \sim \pi^*} [N(T^*, i)] \geq 0. \quad (2)$$

**Proof:**

By definition of  $T_t^*$ , we have that

$$\mathbb{E}_{i \sim \pi_t^*} [N(T^*, i)] \geq \mathbb{E}_{i \sim \pi_t^*} [N(T_t^*, i)].$$

On the other hand, from the inequality (1), we have that

$$\begin{aligned} \mathbb{E}_{i \sim \pi_t^*} [N(T_t^*, i)] &\geq \mathbb{E}_{i \sim \pi^*} [N(T_t^*, i)] - \frac{\|\pi^* - \pi_t^*\|_\infty}{\pi_{\min}^*} \mathbb{E}_{i \sim \pi^*} [N(T_t^*, i)] \\ &= \frac{\pi_{\min}^* - \|\pi^* - \pi_t^*\|_\infty}{\pi_{\min}^*} \mathbb{E}_{i \sim \pi^*} [N(T_t^*, i)]. \end{aligned}$$

Similarly, we have that

$$\begin{aligned} \mathbb{E}_{i \sim \pi_t^*} [N(T^*, i)] &\leq \mathbb{E}_{i \sim \pi^*} [N(T^*, i)] + \frac{\|\pi^* - \pi_t^*\|_\infty}{\pi_{\min}^*} \mathbb{E}_{i \sim \pi^*} [N(T^*, i)] \\ &= \frac{\pi_{\min}^* + \|\pi^* - \pi_t^*\|_\infty}{\pi_{\min}^*} \mathbb{E}_{i \sim \pi^*} [N(T^*, i)]. \end{aligned}$$

Combining the above three inequalities, we have that

$$\frac{\pi_{\min}^* + \|\pi^* - \pi_t^*\|_\infty}{\pi_{\min}^*} \mathbb{E}_{i \sim \pi^*} [N(T^*, i)] \geq \frac{\pi_{\min}^* - \|\pi^* - \pi_t^*\|_\infty}{\pi_{\min}^*} \mathbb{E}_{i \sim \pi^*} [N(T_t^*, i)]$$

That is

$$\frac{\pi_{\min}^* + \|\pi^* - \pi_t^*\|_\infty}{\pi_{\min}^* - \|\pi^* - \pi_t^*\|_\infty} \mathbb{E}_{i \sim \pi^*} [N(T^*, i)] \geq \mathbb{E}_{i \sim \pi^*} [N(T_t^*, i)].$$

So we have

$$\mathbb{E}_{i \sim \pi^*} [N(T_t^*, i)] - \mathbb{E}_{i \sim \pi^*} [N(T^*, i)] \leq \frac{2 \|\pi^* - \pi_t^*\|_\infty}{\pi_{\min}^* - \|\pi^* - \pi_t^*\|_\infty} \mathbb{E}_{i \sim \pi^*} [N(T^*, i)].$$

Finally, notice that by definition of  $T^*$  (i.e.  $T^* \in \arg \min_T \mathbb{E}_{i \sim \pi^*} [N(T, i)]$ ), we have that

$$\mathbb{E}_{i \sim \pi^*} [N(T_t^*, i)] \geq \mathbb{E}_{i \sim \pi^*} [N(T^*, i)].$$

Thus, we have proved Lemma A-2. Q.E.D.

Now we consider the case when the prior belief  $\mathbb{P}_0$  of the system is modeled as a Dirichlet distribution with parameter  $\alpha \in \mathfrak{R}_+^M$  (henceforth denoted as  $\text{Dir}(\alpha)$ ). Specifically, its probability density function (PDF) over the probability simplex  $\Delta^{M-1}$  is given by

$$f_{\mathbb{P}_0}(\pi) = \frac{1}{B(\alpha)} \prod_{i \in \mathcal{I}} \pi(i)^{\alpha(i)-1}, \forall \pi \in \Delta^{M-1},$$

where  $\pi(i)$  is the probability mass at item  $i$ , and  $\alpha(i)$  is the associated parameter.  $B(\alpha)$  is a normalizing constant given by

$$B(\alpha) = \frac{\prod_{i \in \mathcal{I}} \Gamma(\alpha(i))}{\Gamma(\sum_{i \in \mathcal{I}} \alpha(i))},$$

where  $\Gamma(\cdot)$  is the classical gamma function. The main advantage of Dirichlet prior is that it results in a simple posterior distribution, since it is the *conjugate prior* of the multinomial distribution. Specifically,  $\forall t = 0, 1, \dots$ , we define the indicator vector  $Z_t \in \mathfrak{R}^M$  as follows:

$$Z_t(i) = \begin{cases} 1 & \text{if } i = i_t \\ 0 & \text{otherwise} \end{cases}$$

Then, based on the Bayes rule, the posterior belief at the beginning of game  $t$  is

$$\mathbb{P}_t = \text{Dir} \left( \alpha + \sum_{\tau=0}^{t-1} Z_\tau \right).$$

From the properties of Dirichlet distribution, we have that

$$\pi_t^*(i) = \mathbb{E}_{\pi \sim \mathbb{P}_t} [\pi(i)] = \frac{\alpha(i) + \sum_{\tau=0}^{t-1} Z_\tau(i)}{\sum_{i' \in \mathcal{I}} [\alpha(i') + \sum_{\tau=0}^{t-1} Z_\tau(i')]}.$$

Notice that  $\sum_{i' \in \mathcal{I}} \sum_{\tau=0}^{t-1} Z_\tau(i') = \sum_{\tau=0}^{t-1} \sum_{i' \in \mathcal{I}} Z_\tau(i') = \sum_{\tau=0}^{t-1} 1 = t$ . Furthermore, we define  $\alpha_0 = \sum_{i' \in \mathcal{I}} \alpha(i')$ . Thus, we have

$$\pi_t^*(i) = \frac{\alpha(i) + \sum_{\tau=0}^{t-1} Z_\tau(i)}{\alpha_0 + t} = \frac{\alpha_0}{\alpha_0 + t} \frac{\alpha(i)}{\alpha_0} + \frac{t}{\alpha_0 + t} \frac{\sum_{\tau=0}^{t-1} Z_\tau(i)}{t}.$$

Throughout this paper, we use the convention that “ $\frac{0}{0} = 0$ ”, so for  $t = 0$ , we have  $\pi_0^*(i) = \frac{\alpha(i)}{\alpha_0}$ . The above equation has a very nice interpretation: notice that  $\frac{\alpha(i)}{\alpha_0}$  is the estimate of  $\pi^*(i)$  based on the prior belief,

while  $\frac{\sum_{\tau=0}^{t-1} Z_\tau(i)}{t}$  is the estimate of  $\pi^*(i)$  based on observations, the above equation states that  $\pi_t^*(i)$  is a convex combination (weighted average) of these two estimates. Furthermore, the weights depend on  $t$ , the index of the current interactive game (or equivalently, the number of past observations).

From Hoeffding's inequality,  $\forall \epsilon > 0$ , we have that

$$\mathbb{P}\left(\left|\frac{\sum_{\tau=0}^{t-1} Z_\tau(i)}{t} - \pi^*(i)\right| \leq \epsilon\right) \geq 1 - 2\exp(-2\epsilon^2 t).$$

That is, for any  $i \in \mathcal{I}$ , at the beginning of game  $t$ , with probability at least  $1 - 2\exp(-2\epsilon^2 t)$ , we have that

$$\left|\frac{\sum_{\tau=0}^{t-1} Z_\tau(i)}{t} - \pi^*(i)\right| \leq \epsilon.$$

Let  $E_t(i)$  denote the event that  $\left|\frac{\sum_{\tau=0}^{t-1} Z_\tau(i)}{t} - \pi^*(i)\right| > \epsilon$ . Then we have proved that  $\mathbb{P}(E_t(i)) \leq 2\exp(-2\epsilon^2 t)$  for any  $i \in \mathcal{I}$ . From the union bound of the probability, we have that

$$\mathbb{P}(\cup_{i \in \mathcal{I}} E_t(i)) \leq \sum_{i \in \mathcal{I}} \mathbb{P}(E_t(i)) \leq 2M \exp(-2\epsilon^2 t).$$

Thus, with probability at least  $1 - 2M \exp(-2\epsilon^2 t)$ , we have that

$$\max_{i \in \mathcal{I}} \left|\frac{\sum_{\tau=0}^{t-1} Z_\tau(i)}{t} - \pi^*(i)\right| \leq \epsilon.$$

Finally, notice that  $\forall i \in \mathcal{I}$ , we have that

$$\begin{aligned} |\pi^*(i) - \pi_t^*(i)| &= \left| \frac{\alpha_0}{\alpha_0 + t} \left( \frac{\alpha(i)}{\alpha_0} - \pi^*(i) \right) + \frac{t}{\alpha_0 + t} \left( \frac{\sum_{\tau=0}^{t-1} Z_\tau(i)}{t} - \pi^*(i) \right) \right| \\ &\leq \frac{\alpha_0}{\alpha_0 + t} \left| \frac{\alpha(i)}{\alpha_0} - \pi^*(i) \right| + \frac{t}{\alpha_0 + t} \left| \frac{\sum_{\tau=0}^{t-1} Z_\tau(i)}{t} - \pi^*(i) \right|. \end{aligned}$$

Thus we have that

$$\begin{aligned} \max_{i \in \mathcal{I}} |\pi^*(i) - \pi_t^*(i)| &\leq \max_{i \in \mathcal{I}} \left[ \frac{\alpha_0}{\alpha_0 + t} \left| \frac{\alpha(i)}{\alpha_0} - \pi^*(i) \right| + \frac{t}{\alpha_0 + t} \left| \frac{\sum_{\tau=0}^{t-1} Z_\tau(i)}{t} - \pi^*(i) \right| \right] \\ &\leq \frac{\alpha_0}{\alpha_0 + t} \max_{i \in \mathcal{I}} \left| \frac{\alpha(i)}{\alpha_0} - \pi^*(i) \right| + \frac{t}{\alpha_0 + t} \max_{i \in \mathcal{I}} \left| \frac{\sum_{\tau=0}^{t-1} Z_\tau(i)}{t} - \pi^*(i) \right|. \end{aligned}$$

Notice that  $\max_{i \in \mathcal{I}} \left| \frac{\alpha(i)}{\alpha_0} - \pi^*(i) \right|$  is the maximum estimation error based on the prior belief, which is independent of the observations. On the other hand,  $\max_{i \in \mathcal{I}} \left| \frac{\sum_{\tau=0}^{t-1} Z_\tau(i)}{t} - \pi^*(i) \right|$  is the maximum estimation error based on observations, which is a random variable.

Lemma A-3 upper bounds the regret in game  $t$ :

**Lemma A-3:**  $\forall t > 0$  and  $\forall 0 < \eta \leq \frac{1}{3}$ , if

$$\frac{\alpha_0}{\alpha_0 + t} \max_{i \in \mathcal{I}} \left| \frac{\alpha(i)}{\alpha_0} - \pi^*(i) \right| < \eta \pi_{\min}^*,$$

then we have that

$$\mathbb{E}_{T_t^*} \{ \mathbb{E}_{i \sim \pi^*} [N(T_t^*, i)] - \mathbb{E}_{i \sim \pi^*} [N(T^*, i)] \} < 3\eta \mathbb{E}_{i \sim \pi^*} [N(T^*, i)] + 2M|\mathcal{Q}| \exp \left\{ 4\eta\pi_{\min}^* \alpha_0 \max_{i \in \mathcal{I}} \left| \frac{\alpha(i)}{\alpha_0} - \pi^*(i) \right| - 2[\eta\pi_{\min}^*]^2 t \right\}.$$

**Proof:**

Since  $\frac{\alpha_0}{\alpha_0+t} \max_{i \in \mathcal{I}} \left| \frac{\alpha(i)}{\alpha_0} - \pi^*(i) \right| < \eta\pi_{\min}^*$ , thus, one sufficient condition to ensure that

$$\max_{i \in \mathcal{I}} |\pi^*(i) - \pi_t^*(i)| \leq \eta\pi_{\min}^*$$

is

$$\max_{i \in \mathcal{I}} \left| \frac{\sum_{\tau=0}^{t-1} Z_\tau(i)}{t} - \pi^*(i) \right| \leq \eta\pi_{\min}^* \left( 1 + \frac{\alpha_0}{t} \right) - \frac{\alpha_0}{t} \max_{i \in \mathcal{I}} \left| \frac{\alpha(i)}{\alpha_0} - \pi^*(i) \right|. \quad (3)$$

Define  $\epsilon = \eta\pi_{\min}^* \left( 1 + \frac{\alpha_0}{t} \right) - \frac{\alpha_0}{t} \max_{i \in \mathcal{I}} \left| \frac{\alpha(i)}{\alpha_0} - \pi^*(i) \right|$ , from the above discussion, we know that inequality (3) holds with probability at least  $1 - 2M \exp(-2\epsilon^2 t)$ . Furthermore, from Lemma A-2,  $\max_{i \in \mathcal{I}} |\pi^*(i) - \pi_t^*(i)| \leq \eta\pi_{\min}^*$  implies that

$$\frac{2\eta}{1-\eta} \mathbb{E}_{i \sim \pi^*} [N(T^*, i)] \geq \mathbb{E}_{i \sim \pi^*} [N(T_t^*, i)] - \mathbb{E}_{i \sim \pi^*} [N(T^*, i)]. \quad (4)$$

Thus, we have proved that with probability at least  $1 - 2M \exp(-2\epsilon^2 t)$ , inequality (4) holds. In other words, if we define  $E$  as the event that inequality (4) holds, then we have that  $\mathbb{P}(E) \geq 1 - 2M \exp(-2\epsilon^2 t)$

On the other hand, notice that a naive bound on the regret is  $\mathbb{E}_{i \sim \pi^*} [N(T_t^*, i)] - \mathbb{E}_{i \sim \pi^*} [N(T^*, i)] \leq |\mathcal{Q}|$ . With  $E$  defined as the event that inequality (4) holds and  $\bar{E}$  defined as the complement of  $E$ , we have that:

$$\begin{aligned} \mathbb{E}_{T_t^*} \{ \mathbb{E}_{i \sim \pi^*} [N(T_t^*, i)] - \mathbb{E}_{i \sim \pi^*} [N(T^*, i)] \} &\leq \mathbb{P}(E) \mathbb{E}_{T_t^*} \{ \mathbb{E}_{i \sim \pi^*} [N(T_t^*, i)] - \mathbb{E}_{i \sim \pi^*} [N(T^*, i)] | E \} \\ &\quad + [1 - \mathbb{P}(E)] \mathbb{E}_{T_t^*} \{ \mathbb{E}_{i \sim \pi^*} [N(T_t^*, i)] - \mathbb{E}_{i \sim \pi^*} [N(T^*, i)] | \bar{E} \} \\ &\leq \mathbb{P}(E) \frac{2\eta}{1-\eta} \mathbb{E}_{i \sim \pi^*} [N(T^*, i)] + [1 - \mathbb{P}(E)] |\mathcal{Q}|. \end{aligned}$$

On the other hand, notice that  $\mathbb{E}_{i \sim \pi^*} [N(T^*, i)] \leq |\mathcal{Q}|$  by definition, and  $\eta \leq \frac{1}{3}$  implies that  $\frac{2\eta}{1-\eta} \leq 1$ , thus we have  $\frac{2\eta}{1-\eta} \mathbb{E}_{i \sim \pi^*} [N(T^*, i)] \leq |\mathcal{Q}|$ . Together with  $\mathbb{P}(E) \geq 1 - 2M \exp(-2\epsilon^2 t)$ , we have that

$$\begin{aligned} \mathbb{E}_{T_t^*} \{ \mathbb{E}_{i \sim \pi^*} [N(T_t^*, i)] - \mathbb{E}_{i \sim \pi^*} [N(T^*, i)] \} &\leq [1 - 2M \exp(-2\epsilon^2 t)] \frac{2\eta}{1-\eta} \mathbb{E}_{i \sim \pi^*} [N(T^*, i)] + 2M \exp(-2\epsilon^2 t) |\mathcal{Q}| \\ &< \frac{2\eta}{1-\eta} \mathbb{E}_{i \sim \pi^*} [N(T^*, i)] + 2M|\mathcal{Q}| \exp(-2\epsilon^2 t). \end{aligned}$$

Notice that  $0 < \eta \leq \frac{1}{3}$  implies that  $0 < \frac{1}{1-\eta} \leq \frac{3}{2}$ , thus  $0 < \frac{2\eta}{1-\eta} \leq 3\eta$ . Hence we have that

$$\mathbb{E}_{T_t^*} \{ \mathbb{E}_{i \sim \pi^*} [N(T_t^*, i)] - \mathbb{E}_{i \sim \pi^*} [N(T^*, i)] \} < 3\eta \mathbb{E}_{i \sim \pi^*} [N(T^*, i)] + 2M|\mathcal{Q}| \exp(-2\epsilon^2 t).$$

From the definition of  $\epsilon$ , we have

$$\begin{aligned} \epsilon^2 t &= \left[ \eta\pi_{\min}^* \sqrt{t} + \frac{\alpha_0}{\sqrt{t}} \left( \eta\pi_{\min}^* - \max_{i \in \mathcal{I}} \left| \frac{\alpha(i)}{\alpha_0} - \pi^*(i) \right| \right) \right]^2 \\ &= [\eta\pi_{\min}^*]^2 t + 2\eta\pi_{\min}^* \alpha_0 \left( \eta\pi_{\min}^* - \max_{i \in \mathcal{I}} \left| \frac{\alpha(i)}{\alpha_0} - \pi^*(i) \right| \right) + \frac{\alpha_0^2}{t} \left( \eta\pi_{\min}^* - \max_{i \in \mathcal{I}} \left| \frac{\alpha(i)}{\alpha_0} - \pi^*(i) \right| \right)^2 \\ &> [\eta\pi_{\min}^*]^2 t - 2\eta\pi_{\min}^* \alpha_0 \max_{i \in \mathcal{I}} \left| \frac{\alpha(i)}{\alpha_0} - \pi^*(i) \right|, \end{aligned}$$

where the last inequality follows from the fact that  $\frac{\alpha_0^2}{t} \left( \eta \pi_{\min}^* - \max_{i \in \mathcal{I}} \left| \frac{\alpha(i)}{\alpha_0} - \pi^*(i) \right| \right)^2 \geq 0$  and  $[\eta \pi_{\min}^*]^2 \alpha_0 > 0$ . So we have

$$-2\epsilon^2 t < 4\eta \pi_{\min}^* \alpha_0 \max_{i \in \mathcal{I}} \left| \frac{\alpha(i)}{\alpha_0} - \pi^*(i) \right| - 2[\eta \pi_{\min}^*]^2 t.$$

Thus, we have proved Lemma A-3. Q.E.D.

We define  $\tau_E$  as

$$\tau_E = \min \left\{ t \geq 4 : \frac{\ln(t)}{t} \leq \left( \frac{\pi_{\min}^*}{6} \right)^2 \text{ and } \frac{4}{3} \alpha_0 \max_{i \in \mathcal{I}} \left| \frac{\alpha(i)}{\alpha_0} - \pi^*(i) \right| \leq [t \ln(t)]^{\frac{1}{2}} \right\}, \quad (5)$$

where  $\ln(\cdot)$  is the logarithm function with base  $e$ . Notice that for  $t \geq 3$ ,  $\frac{\ln(t)}{t}$  is monotonically decreasing. Notice that  $\tau_E$  depends on (1)  $\pi_{\min}^*$  and (2) the ‘‘quality’’ of the prior. Lemma A-4 derives a more useful one-game regret bound based on Lemma A-3 and the definition of  $\tau_E$ :

**Lemma A-4:**  $\forall t \geq \tau_E$ , we have

$$\mathbb{E}_{T_t^*} \{ \mathbb{E}_{i \sim \pi^*} [N(T_t^*, i)] - \mathbb{E}_{i \sim \pi^*} [N(T^*, i)] \} < \frac{6}{\pi_{\min}^*} \left[ \frac{\ln(t)}{t} \right]^{\frac{1}{2}} \mathbb{E}_{i \sim \pi^*} [N(T^*, i)] + \frac{2M|\mathcal{Q}|}{t^2},$$

where  $\tau_E$  is defined in Eqn(5).

**Proof:**

For  $\forall t \geq \tau_E$ , we choose  $\eta = \frac{2}{\pi_{\min}^*} \left[ \frac{\ln(t)}{t} \right]^{\frac{1}{2}}$ . We first show that this particular  $\eta$  satisfies the conditions of Lemma A-3. Since  $\frac{\ln(t)}{t}$  is monotonically decreasing for  $t \geq 3$  and  $t \geq \tau_E \geq 4$ , we have that

$$\eta = \frac{2}{\pi_{\min}^*} \left[ \frac{\ln(t)}{t} \right]^{\frac{1}{2}} \leq \frac{2}{\pi_{\min}^*} \left[ \frac{\ln(\tau_E)}{\tau_E} \right]^{\frac{1}{2}} \leq \frac{2}{\pi_{\min}^*} \frac{\pi_{\min}^*}{6} = \frac{1}{3}.$$

On the other hand, since  $t \ln(t)$  is monotonically increasing, thus,  $t \geq \tau_E$  implies that

$$\frac{4}{3} \alpha_0 \max_{i \in \mathcal{I}} \left| \frac{\alpha(i)}{\alpha_0} - \pi^*(i) \right| \leq [t \ln(t)]^{\frac{1}{2}}.$$

Thus

$$\frac{\alpha_0}{\alpha_0 + t} \max_{i \in \mathcal{I}} \left| \frac{\alpha(i)}{\alpha_0} - \pi^*(i) \right| < \frac{\alpha_0}{t} \max_{i \in \mathcal{I}} \left| \frac{\alpha(i)}{\alpha_0} - \pi^*(i) \right| \leq \frac{3[t \ln(t)]^{\frac{1}{2}}}{4t} = \frac{2}{\pi_{\min}^*} \left[ \frac{\ln(t)}{t} \right]^{\frac{1}{2}} \frac{3\pi_{\min}^*}{8} = \frac{3\pi_{\min}^*}{8} \eta < \eta \pi_{\min}^*.$$

Thus, the conditions of Lemma A-3 are satisfied and we have that

$$\mathbb{E}_{T_t^*} \{ \mathbb{E}_{i \sim \pi^*} [N(T_t^*, i)] - \mathbb{E}_{i \sim \pi^*} [N(T^*, i)] \} < 3\eta \mathbb{E}_{i \sim \pi^*} [N(T^*, i)] + 2M|\mathcal{Q}| \exp \left\{ 4\eta \pi_{\min}^* \alpha_0 \max_{i \in \mathcal{I}} \left| \frac{\alpha(i)}{\alpha_0} - \pi^*(i) \right| - 2[\eta \pi_{\min}^*]^2 t \right\}.$$

Notice that

$$4\eta \pi_{\min}^* \alpha_0 \max_{i \in \mathcal{I}} \left| \frac{\alpha(i)}{\alpha_0} - \pi^*(i) \right| = 8 \left[ \frac{\ln(t)}{t} \right]^{\frac{1}{2}} \alpha_0 \max_{i \in \mathcal{I}} \left| \frac{\alpha(i)}{\alpha_0} - \pi^*(i) \right| \leq 8 \left[ \frac{\ln(t)}{t} \right]^{\frac{1}{2}} \frac{3}{4} [t \ln(t)]^{\frac{1}{2}} = 6 \ln(t),$$

and

$$2[\eta \pi_{\min}^*]^2 t = 2 \left[ \left( \frac{2}{\pi_{\min}^*} \left[ \frac{\ln(t)}{t} \right]^{\frac{1}{2}} \right) \pi_{\min}^* \right]^2 t = 2 \left[ \left( 2 \left[ \frac{\ln(t)}{t} \right]^{\frac{1}{2}} \right) \right]^2 t = 8 \ln(t).$$

Thus we have

$$\exp \left\{ 4\eta\pi_{\min}^*\alpha_0 \max_{i \in \mathcal{I}} \left| \frac{\alpha(i)}{\alpha_0} - \pi^*(i) \right| - 2[\eta\pi_{\min}^*]^2 t \right\} \leq \exp \{6 \ln(t) - 8 \ln(t)\} = \exp \{-2 \ln(t)\} = \frac{1}{t^2}.$$

On the other hand, we have that  $3\eta = \frac{6}{\pi_{\min}^*} \left[ \frac{\ln(t)}{t} \right]^{\frac{1}{2}}$ , thus we have

$$\begin{aligned} \mathbb{E}_{T_t^*} \{ \mathbb{E}_{i \sim \pi^*} [N(T_t^*, i)] - \mathbb{E}_{i \sim \pi^*} [N(T^*, i)] \} &< 3\eta \mathbb{E}_{i \sim \pi^*} [N(T^*, i)] + 2M|\mathcal{Q}| \exp \left\{ 4\eta\pi_{\min}^*\alpha_0 \max_{i \in \mathcal{I}} \left| \frac{\alpha(i)}{\alpha_0} - \pi^*(i) \right| - 2[\eta\pi_{\min}^*]^2 t \right\} \\ &\leq \frac{6}{\pi_{\min}^*} \left[ \frac{\ln(t)}{t} \right]^{\frac{1}{2}} \mathbb{E}_{i \sim \pi^*} [N(T^*, i)] + \frac{2M|\mathcal{Q}|}{t^2}. \end{aligned}$$

Q.E.D.

In this remainder of this section, we prove Theorem 1:

**Proof of Theorem 1:**

Notice that a naive bound on  $\mathbb{E}_{T_t^*} \{ \mathbb{E}_{i \sim \pi^*} [N(T_t^*, i)] - \mathbb{E}_{i \sim \pi^*} [N(T^*, i)] \}$  is

$$\mathbb{E}_{T_t^*} \{ \mathbb{E}_{i \sim \pi^*} [N(T_t^*, i)] - \mathbb{E}_{i \sim \pi^*} [N(T^*, i)] \} \leq |\mathcal{Q}|.$$

Thus, for  $0 \leq \tau < \tau_E$ , we have that

$$\sum_{t=0}^{\tau} \mathbb{E}_{T_t^*} \{ \mathbb{E}_{i \sim \pi^*} [N(T_t^*, i)] - \mathbb{E}_{i \sim \pi^*} [N(T^*, i)] \} \leq |\mathcal{Q}|(\tau + 1).$$

On the other hand, from Lemma A-4, for  $\tau \geq \tau_E$ , we have that

$$\begin{aligned} \sum_{t=0}^{\tau} \mathbb{E}_{T_t^*} \{ \mathbb{E}_{i \sim \pi^*} [N(T_t^*, i)] - \mathbb{E}_{i \sim \pi^*} [N(T^*, i)] \} &= \sum_{t=0}^{\tau_E-1} \mathbb{E}_{T_t^*} \{ \mathbb{E}_{i \sim \pi^*} [N(T_t^*, i)] - \mathbb{E}_{i \sim \pi^*} [N(T^*, i)] \} \\ &\quad + \sum_{t=\tau_E}^{\tau} \mathbb{E}_{T_t^*} \{ \mathbb{E}_{i \sim \pi^*} [N(T_t^*, i)] - \mathbb{E}_{i \sim \pi^*} [N(T^*, i)] \} \\ &\leq |\mathcal{Q}|\tau_E + \sum_{t=\tau_E}^{\tau} \mathbb{E}_{T_t^*} \{ \mathbb{E}_{i \sim \pi^*} [N(T_t^*, i)] - \mathbb{E}_{i \sim \pi^*} [N(T^*, i)] \} \\ &\leq |\mathcal{Q}|\tau_E + \sum_{t=\tau_E}^{\tau} \left[ \frac{6}{\pi_{\min}^*} \left[ \frac{\ln(t)}{t} \right]^{\frac{1}{2}} \mathbb{E}_{i \sim \pi^*} [N(T^*, i)] + \frac{2M|\mathcal{Q}|}{t^2} \right], \end{aligned}$$

where the first inequality follows from the naive bound and the second inequality follows from Lemma A-4. Since  $\tau_E > 1$ , we have that

$$\sum_{t=\tau_E}^{\tau} \frac{1}{t^2} < \sum_{t=\tau_E}^{\infty} \frac{1}{t^2} < \sum_{t=\tau_E}^{\infty} \frac{1}{(t-1)t} = \sum_{t=\tau_E}^{\infty} \left[ \frac{1}{t-1} - \frac{1}{t} \right] = \frac{1}{\tau_E - 1}.$$

On the other hand, notice that  $\frac{\ln(t)}{t}$  is monotonically decreasing on interval  $[\tau_E - 1, \infty)$  (Since  $\tau_E - 1 \geq 3$ ), and the derivative of the function  $[t \ln(t)]^{\frac{1}{2}}$  is  $\frac{1}{2} \left[ \frac{1}{t \ln(t)} \right]^{\frac{1}{2}} + \frac{1}{2} \left[ \frac{\ln(t)}{t} \right]^{\frac{1}{2}}$ , we have that

$$\sum_{t=\tau_E}^{\tau} \left[ \frac{\ln(t)}{t} \right]^{\frac{1}{2}} < \int_{\tau_E-1}^{\tau} \left[ \frac{\ln(t)}{t} \right]^{\frac{1}{2}} dt < \int_{\tau_E-1}^{\tau} \left( \left[ \frac{\ln(t)}{t} \right]^{\frac{1}{2}} + \left[ \frac{1}{t \ln(t)} \right]^{\frac{1}{2}} \right) dt = 2[\tau \ln(\tau)]^{\frac{1}{2}} - 2[(\tau_E - 1) \ln(\tau_E - 1)]^{\frac{1}{2}}.$$

Thus, for  $\tau \geq \tau_E$ , we have that

$$\begin{aligned} & \sum_{t=0}^{\tau} \mathbb{E}_{T_t^*} \{ \mathbb{E}_{i \sim \pi^*} [N(T_t^*, i)] - \mathbb{E}_{i \sim \pi^*} [N(T^*, i)] \} \leq |\mathcal{Q}| \tau_E + \sum_{t=\tau_E}^{\tau} \left[ \frac{6}{\pi_{\min}^*} \left[ \frac{\ln(t)}{t} \right]^{\frac{1}{2}} \mathbb{E}_{i \sim \pi^*} [N(T^*, i)] + \frac{2M|\mathcal{Q}|}{t^2} \right] \\ & < |\mathcal{Q}| \tau_E + \frac{12 \mathbb{E}_{i \sim \pi^*} [N(T^*, i)]}{\pi_{\min}^*} \left\{ [\tau \ln(\tau)]^{\frac{1}{2}} - [(\tau_E - 1) \ln(\tau_E - 1)]^{\frac{1}{2}} \right\} + \frac{2M|\mathcal{Q}|}{\tau_E - 1} = O([\tau \ln(\tau)]^{\frac{1}{2}}). \end{aligned}$$

Q.E.D.



## B Proof of Theorem 2

Throughout this section, we assume that the certainty-equivalent (CE) optimization problem is solved by the greedy algorithm, and use  $T_t^g$  to denote the solution based on the greedy algorithm of the CE optimization problem in game  $t$ ,  $\forall t = 0, 1, \dots$ . Note that in the proof, **we still use  $T_t^*$  to denote the exact solution of the CE optimization problem in game  $t$** . Lemma A-5 is the counterpart of Lemma A-2 in this case:

**Lemma A-5:** *If  $\|\pi^* - \pi_t^*\|_\infty < \pi_{\min}^*$ , then we have*

$$\mathbb{E}_{i \sim \pi^*} [N(T_t^g, i)] \leq \mathbb{E}_{i \sim \pi^*} [N(T_t^*, i)] \left[ \frac{\pi_{\min}^* + \|\pi^* - \pi_t^*\|_\infty}{\pi_{\min}^* - \|\pi^* - \pi_t^*\|_\infty} \right]^2 \ln \left( \frac{e}{\pi_{\min}^* - \|\pi^* - \pi_t^*\|_\infty} \right).$$

**Proof:**

Before proceeding, notice that from Theorem 10 of [1], we have that

$$\mathbb{E}_{i \sim \pi_t^*} [N(T_t^g, i)] \leq \mathbb{E}_{i \sim \pi_t^*} [N(T_t^*, i)] \left( \ln \left( \frac{1}{\min_i \pi_t^*(i)} \right) + 1 \right),$$

where  $T_t^*$  is the exact solution of the CE optimization problem in game  $t$ , and  $T_t^g$  is the approximation solution based on the greedy algorithm. From Lemma A-1, we know that

$$\mathbb{E}_{i \sim \pi_t^*} [N(T_t^g, i)] \geq \frac{\pi_{\min}^* - \|\pi^* - \pi_t^*\|_\infty}{\pi_{\min}^*} \mathbb{E}_{i \sim \pi^*} [N(T_t^g, i)],$$

and

$$\mathbb{E}_{i \sim \pi_t^*} [N(T_t^*, i)] \leq \frac{\pi_{\min}^* + \|\pi^* - \pi_t^*\|_\infty}{\pi_{\min}^*} \mathbb{E}_{i \sim \pi^*} [N(T_t^*, i)].$$

Thus we have that

$$\begin{aligned} & \frac{\pi_{\min}^* - \|\pi^* - \pi_t^*\|_\infty}{\pi_{\min}^*} \mathbb{E}_{i \sim \pi^*} [N(T_t^g, i)] \\ & \leq \frac{\pi_{\min}^* + \|\pi^* - \pi_t^*\|_\infty}{\pi_{\min}^*} \mathbb{E}_{i \sim \pi^*} [N(T_t^*, i)] \left( \ln \left( \frac{1}{\min_i \pi_t^*(i)} \right) + 1 \right). \end{aligned}$$

We define  $c = \frac{\pi_{\min}^* + \|\pi^* - \pi_t^*\|_\infty}{\pi_{\min}^* - \|\pi^* - \pi_t^*\|_\infty}$ , thus we have that

$$\mathbb{E}_{i \sim \pi^*} [N(T_t^g, i)] \leq c \mathbb{E}_{i \sim \pi^*} [N(T_t^*, i)] \left( \ln \left( \frac{1}{\min_i \pi_t^*(i)} \right) + 1 \right).$$

Combining with Lemma A-2, we have that

$$\mathbb{E}_{i \sim \pi^*} [N(T_t^g, i)] \leq c^2 \mathbb{E}_{i \sim \pi^*} [N(T_t^*, i)] \left( \ln \left( \frac{1}{\min_i \pi_t^*(i)} \right) + 1 \right). \quad (6)$$

Finally, assume that  $\min_i \pi_t^*(i) = \pi_t^*(i^*)$ , we have that

$$\min_i \pi_t^*(i) = \pi_t^*(i^*) = \pi^*(i^*) + [\pi_t^*(i^*) - \pi^*(i^*)] \geq \pi_{\min}^* - \|\pi^* - \pi_t^*\|_\infty.$$

So we have

$$\ln \left( \frac{1}{\min_i \pi_t^*(i)} \right) \leq \ln \left( \frac{1}{\pi_{\min}^* - \|\pi^* - \pi_t^*\|_\infty} \right).$$

Hence

$$\ln \left( \frac{1}{\min_i \pi_t^*(i)} \right) + 1 \leq \ln \left( \frac{1}{\pi_{\min}^* - \|\pi^* - \pi_t^*\|_\infty} \right) + 1 = \ln \left( \frac{e}{\pi_{\min}^* - \|\pi^* - \pi_t^*\|_\infty} \right).$$

Plug the above inequality into Eqn(6), we have proved Lemma A-5. Q.E.D.

Lemma A-6 upper bounds the scaled regret in game  $t$ :

**Lemma A-6:**  $\forall t > 0$  and  $\forall 0 < \eta < 1$ , if

$$\left[\frac{1+\eta}{1-\eta}\right]^2 \ln\left(\frac{1}{1-\eta}\right) + \frac{4\eta}{(1-\eta)^2} \ln\left(\frac{e}{\pi_{\min}^*}\right) \leq 1 \quad \text{and} \quad \frac{\alpha_0}{\alpha_0+t} \max_{i \in \mathcal{I}} \left| \frac{\alpha(i)}{\alpha_0} - \pi^*(i) \right| < \eta \pi_{\min}^*,$$

then we have that

$$\begin{aligned} & \mathbb{E}_{T_t^g} \left\{ \mathbb{E}_{i \sim \pi^*} [N(T_t^g, i)] - \ln\left(\frac{e}{\pi_{\min}^*}\right) \mathbb{E}_{i \sim \pi^*} [N(T^*, i)] \right\} \\ & < \left\{ \left[\frac{1+\eta}{1-\eta}\right]^2 \ln\left(\frac{1}{1-\eta}\right) + \frac{4\eta}{(1-\eta)^2} \ln\left(\frac{e}{\pi_{\min}^*}\right) \right\} \mathbb{E}_{i \sim \pi^*} [N(T^*, i)] \\ & + 2M|\mathcal{Q}| \exp\left(4\eta\pi_{\min}^*\alpha_0 \max_{i \in \mathcal{I}} \left| \frac{\alpha(i)}{\alpha_0} - \pi^*(i) \right| - 2[\eta\pi_{\min}^*]^2 t\right). \end{aligned}$$

**Proof:**

Since  $\frac{\alpha_0}{\alpha_0+t} \max_{i \in \mathcal{I}} \left| \frac{\alpha(i)}{\alpha_0} - \pi^*(i) \right| < \eta \pi_{\min}^*$ , thus, one sufficient condition to ensure that

$$\max_{i \in \mathcal{I}} |\pi^*(i) - \pi_t^*(i)| \leq \eta \pi_{\min}^*$$

is

$$\max_{i \in \mathcal{I}} \left| \frac{\sum_{\tau=0}^{t-1} Z_\tau(i)}{t} - \pi^*(i) \right| \leq \eta \pi_{\min}^* \left(1 + \frac{\alpha_0}{t}\right) - \frac{\alpha_0}{t} \max_{i \in \mathcal{I}} \left| \frac{\alpha(i)}{\alpha_0} - \pi^*(i) \right|. \quad (7)$$

We define  $\epsilon = \eta \pi_{\min}^* \left(1 + \frac{\alpha_0}{t}\right) - \frac{\alpha_0}{t} \max_{i \in \mathcal{I}} \left| \frac{\alpha(i)}{\alpha_0} - \pi^*(i) \right|$ . From the discussion before Lemma A-3, we know that inequality (7) holds with probability at least  $1 - 2M \exp(-2\epsilon^2 t)$ . Furthermore, from Lemma A-5,  $\|\pi^* - \pi_t^*\| \leq \eta \pi_{\min}^*$  implies that

$$\mathbb{E}_{i \sim \pi^*} [N(T_t^g, i)] \leq \mathbb{E}_{i \sim \pi^*} [N(T^*, i)] \left[\frac{1+\eta}{1-\eta}\right]^2 \ln\left(\frac{e}{\pi_{\min}^*(1-\eta)}\right).$$

Thus we have that

$$\begin{aligned} & \mathbb{E}_{i \sim \pi^*} [N(T_t^g, i)] - \ln\left(\frac{e}{\pi_{\min}^*}\right) \mathbb{E}_{i \sim \pi^*} [N(T^*, i)] \\ & \leq \left\{ \left[\frac{1+\eta}{1-\eta}\right]^2 \ln\left(\frac{e}{\pi_{\min}^*(1-\eta)}\right) - \ln\left(\frac{e}{\pi_{\min}^*}\right) \right\} \mathbb{E}_{i \sim \pi^*} [N(T^*, i)] \\ & = \left\{ \left[\frac{1+\eta}{1-\eta}\right]^2 \ln\left(\frac{1}{1-\eta}\right) + \frac{4\eta}{(1-\eta)^2} \ln\left(\frac{e}{\pi_{\min}^*}\right) \right\} \mathbb{E}_{i \sim \pi^*} [N(T^*, i)]. \end{aligned} \quad (8)$$

Thus, we have proved that with probability at least  $1 - 2M \exp(-2\epsilon^2 t)$ , inequality (8) holds. In other words, if we define  $E$  as the event that inequality (8) holds, then we have that  $\mathbb{P}(E) \geq 1 - 2M \exp(-2\epsilon^2 t)$ .

On the other hand, notice that a naive bound on the scaled regret is

$$\mathbb{E}_{i \sim \pi^*} [N(T_t^g, i)] - \ln\left(\frac{e}{\pi_{\min}^*}\right) \mathbb{E}_{i \sim \pi^*} [N(T^*, i)] \leq |\mathcal{Q}|.$$

With  $E$  defined as the event that inequality (8) holds and  $\bar{E}$  defined as the complement of  $E$ , we have that:

$$\begin{aligned}
& \mathbb{E}_{T_t^g} \left\{ \mathbb{E}_{i \sim \pi^*} [N(T_t^g, i)] - \ln \left( \frac{e}{\pi_{\min}^*} \right) \mathbb{E}_{i \sim \pi^*} [N(T^*, i)] \right\} \\
& \leq \mathbb{P}(E) \mathbb{E}_{T_t^g} \left\{ \mathbb{E}_{i \sim \pi^*} [N(T_t^g, i)] - \ln \left( \frac{e}{\pi_{\min}^*} \right) \mathbb{E}_{i \sim \pi^*} [N(T^*, i)] \mid E \right\} \\
& + [1 - \mathbb{P}(E)] \mathbb{E}_{T_t^g} \left\{ \mathbb{E}_{i \sim \pi^*} [N(T_t^g, i)] - \ln \left( \frac{e}{\pi_{\min}^*} \right) \mathbb{E}_{i \sim \pi^*} [N(T^*, i)] \mid \bar{E} \right\} \\
& \leq \mathbb{P}(E) \left\{ \left[ \frac{1+\eta}{1-\eta} \right]^2 \ln \left( \frac{1}{1-\eta} \right) + \frac{4\eta}{(1-\eta)^2} \ln \left( \frac{e}{\pi_{\min}^*} \right) \right\} \mathbb{E}_{i \sim \pi^*} [N(T^*, i)] + [1 - \mathbb{P}(E)] |\mathcal{Q}|.
\end{aligned}$$

On the other hand, notice that  $\mathbb{E}_{i \sim \pi^*} [N(T^*, i)] \leq |\mathcal{Q}|$  by definition, and  $\left[ \frac{1+\eta}{1-\eta} \right]^2 \ln \left( \frac{1}{1-\eta} \right) + \frac{4\eta}{(1-\eta)^2} \ln \left( \frac{e}{\pi_{\min}^*} \right) \leq 1$ , thus we have

$$\left\{ \left[ \frac{1+\eta}{1-\eta} \right]^2 \ln \left( \frac{1}{1-\eta} \right) + \frac{4\eta}{(1-\eta)^2} \ln \left( \frac{e}{\pi_{\min}^*} \right) \right\} \mathbb{E}_{i \sim \pi^*} [N(T^*, i)] \leq |\mathcal{Q}|.$$

Together with  $\mathbb{P}(E) \geq 1 - 2M \exp(-2\epsilon^2 t)$ , we have that

$$\begin{aligned}
& \mathbb{E}_{T_t^g} \left\{ \mathbb{E}_{i \sim \pi^*} [N(T_t^g, i)] - \ln \left( \frac{e}{\pi_{\min}^*} \right) \mathbb{E}_{i \sim \pi^*} [N(T^*, i)] \right\} \\
& \leq \left\{ \left[ \frac{1+\eta}{1-\eta} \right]^2 \ln \left( \frac{1}{1-\eta} \right) + \frac{4\eta}{(1-\eta)^2} \ln \left( \frac{e}{\pi_{\min}^*} \right) \right\} \mathbb{E}_{i \sim \pi^*} [N(T^*, i)] + 2M|\mathcal{Q}| \exp(-2\epsilon^2 t).
\end{aligned}$$

From the definition of  $\epsilon$ , we have

$$\begin{aligned}
\epsilon^2 t & = \left[ \eta \pi_{\min}^* \sqrt{t} + \frac{\alpha_0}{\sqrt{t}} \left( \eta \pi_{\min}^* - \max_{i \in \mathcal{I}} \left| \frac{\alpha(i)}{\alpha_0} - \pi^*(i) \right| \right) \right]^2 \\
& = [\eta \pi_{\min}^*]^2 t + 2\eta \pi_{\min}^* \alpha_0 \left( \eta \pi_{\min}^* - \max_{i \in \mathcal{I}} \left| \frac{\alpha(i)}{\alpha_0} - \pi^*(i) \right| \right) + \frac{\alpha_0^2}{t} \left( \eta \pi_{\min}^* - \max_{i \in \mathcal{I}} \left| \frac{\alpha(i)}{\alpha_0} - \pi^*(i) \right| \right)^2 \\
& > [\eta \pi_{\min}^*]^2 t - 2\eta \pi_{\min}^* \alpha_0 \max_{i \in \mathcal{I}} \left| \frac{\alpha(i)}{\alpha_0} - \pi^*(i) \right|,
\end{aligned}$$

where the last inequality follows from the fact that  $\frac{\alpha_0^2}{t} \left( \eta \pi_{\min}^* - \max_{i \in \mathcal{I}} \left| \frac{\alpha(i)}{\alpha_0} - \pi^*(i) \right| \right)^2 \geq 0$  and  $[\eta \pi_{\min}^*]^2 \alpha_0 > 0$ . So we have

$$-2\epsilon^2 t < 4\eta \pi_{\min}^* \alpha_0 \max_{i \in \mathcal{I}} \left| \frac{\alpha(i)}{\alpha_0} - \pi^*(i) \right| - 2[\eta \pi_{\min}^*]^2 t.$$

Thus, we have proved Lemma A-6. Q.E.D.

Before proceeding, we derive a sufficient condition for

$$\left[ \frac{1+\eta}{1-\eta} \right]^2 \ln \left( \frac{1}{1-\eta} \right) + \frac{4\eta}{(1-\eta)^2} \ln \left( \frac{e}{\pi_{\min}^*} \right) \leq 1$$

that is easy to verify. Notice that  $f(\eta) = \left[ \frac{1+\eta}{1-\eta} \right]^2 \ln \left( \frac{1}{1-\eta} \right) + \frac{4\eta}{(1-\eta)^2} \ln \left( \frac{e}{\pi_{\min}^*} \right)$  is an increasing and continuous function of  $\eta$  on interval  $[0, 1)$ , and  $f(0) = 0$ ,  $\lim_{\eta \uparrow 1} f(\eta) = \infty$ , thus, there exists an  $\eta^* \in (0, 1)$  such that  $f(\eta^*) = 1$ . Similarly, we can show that  $g(\eta) = \left[ \frac{1+\eta}{1-\eta} \right]^2 \ln \left( \frac{1}{1-\eta} \right) + \frac{4\eta}{(1-\eta)^2}$  is an increasing and continuous function of  $\eta$ , and  $g(0.1378) = 1$ .

We now show that if  $\eta \leq \frac{0.1378}{\ln\left(\frac{e}{\pi_{\min}^*}\right)}$ , then  $f(\eta) \leq 1$ . Notice that since  $\ln\left(\frac{e}{\pi_{\min}^*}\right) \geq 1$ , then we have  $\frac{0.1378}{\ln\left(\frac{e}{\pi_{\min}^*}\right)} \leq 0.1378$ . Thus we have, for  $\eta \leq \frac{0.1378}{\ln\left(\frac{e}{\pi_{\min}^*}\right)}$ ,

$$f(\eta) \leq f\left[\frac{0.1378}{\ln\left(\frac{e}{\pi_{\min}^*}\right)}\right] \leq g(0.1378) = 1. \quad (9)$$

Thus, one sufficient condition for  $\left[\frac{1+\eta}{1-\eta}\right]^2 \ln\left(\frac{1}{1-\eta}\right) + \frac{4\eta}{(1-\eta)^2} \ln\left(\frac{e}{\pi_{\min}^*}\right) \leq 1$  is that  $\eta \leq \frac{0.1378}{\ln\left(\frac{e}{\pi_{\min}^*}\right)}$ .

We define  $\tau_G$  as

$$\tau_G = \min \left\{ t \geq 4 : \frac{\ln(t)}{t} \leq \left(\frac{0.0689\pi_{\min}^*}{\ln\left(\frac{e}{\pi_{\min}^*}\right)}\right)^2 \text{ and } \frac{4}{3}\alpha_0 \max_{i \in \mathcal{I}} \left| \frac{\alpha(i)}{\alpha_0} - \pi^*(i) \right| \leq [t \ln(t)]^{\frac{1}{2}} \right\}. \quad (10)$$

Lemma A-7 derives a more useful one-game regret bound based on Lemma A-5 and definition of  $\tau_G$ :

**Lemma A-7:**  $\forall t \geq \tau_G$ , we have that

$$\begin{aligned} & \mathbb{E}_{T_t^g} \left\{ \mathbb{E}_{i \sim \pi^*} [N(T_t^g, i)] - \ln\left(\frac{e}{\pi_{\min}^*}\right) \mathbb{E}_{i \sim \pi^*} [N(T^*, i)] \right\} \\ & < \left[ 8 + 12 \ln\left(\frac{e}{\pi_{\min}^*}\right) \right] \frac{1}{\pi_{\min}^*} \left[ \frac{\ln(t)}{t} \right]^{\frac{1}{2}} \mathbb{E}_{i \sim \pi^*} [N(T^*, i)] + \frac{2M|\mathcal{Q}|}{t^2}. \end{aligned}$$

**Proof:**

For  $t \geq \tau_G$ , we choose  $\eta = \frac{2}{\pi_{\min}^*} \left[ \frac{\ln(t)}{t} \right]^{\frac{1}{2}}$ . We first show that this particular  $\eta$  satisfies the conditions of Lemma A-6. Since  $\frac{\ln(t)}{t}$  is monotonically decreasing for  $t \geq 3$  and  $t \geq \tau_G \geq 4$ , we have that

$$\eta = \frac{2}{\pi_{\min}^*} \left[ \frac{\ln(t)}{t} \right]^{\frac{1}{2}} \leq \frac{2}{\pi_{\min}^*} \left[ \frac{\ln(\tau_G)}{\tau_G} \right]^{\frac{1}{2}} \leq \frac{0.1378}{\ln\left(\frac{e}{\pi_{\min}^*}\right)}.$$

From the discussion above, we have  $\left[\frac{1+\eta}{1-\eta}\right]^2 \ln\left(\frac{1}{1-\eta}\right) + \frac{4\eta}{(1-\eta)^2} \ln\left(\frac{e}{\pi_{\min}^*}\right) \leq 1$  for  $\eta = \frac{2}{\pi_{\min}^*} \left[ \frac{\ln(t)}{t} \right]^{\frac{1}{2}}$ .

On the other hand, since  $t \ln(t)$  is monotonically increasing, thus,  $t \geq \tau_G$  implies that

$$\frac{4}{3}\alpha_0 \max_{i \in \mathcal{I}} \left| \frac{\alpha(i)}{\alpha_0} - \pi^*(i) \right| \leq [t \ln(t)]^{\frac{1}{2}}.$$

Similarly as the proof for Lemma A-4, we have that

$$\frac{\alpha_0}{\alpha_0 + t} \max_{i \in \mathcal{I}} \left| \frac{\alpha(i)}{\alpha_0} - \pi^*(i) \right| < \frac{\alpha_0}{t} \max_{i \in \mathcal{I}} \left| \frac{\alpha(i)}{\alpha_0} - \pi^*(i) \right| \leq \frac{3[t \ln(t)]^{\frac{1}{2}}}{4t} = \frac{2}{\pi_{\min}^*} \left[ \frac{\ln(t)}{t} \right]^{\frac{1}{2}} \frac{3\pi_{\min}^*}{8} = \frac{3\pi_{\min}^*}{8} \eta < \eta \pi_{\min}^*.$$

Thus, the conditions of Lemma A-6 are satisfied. Furthermore, similarly as the proof for Lemma A-4, we have that

$$\exp \left\{ 4\eta \pi_{\min}^* \alpha_0 \max_{i \in \mathcal{I}} \left| \frac{\alpha(i)}{\alpha_0} - \pi^*(i) \right| - 2[\eta \pi_{\min}^*]^2 t \right\} \leq \exp \{ 6 \ln(t) - 8 \ln(t) \} = \exp \{ -2 \ln(t) \} = \frac{1}{t^2}$$

for  $t \geq \tau_G$ .

We now bound the term  $\left[\frac{1+\eta}{1-\eta}\right]^2 \ln\left(\frac{1}{1-\eta}\right) + \frac{4\eta}{(1-\eta)^2} \ln\left(\frac{e}{\pi_{\min}^*}\right)$ . Notice that for  $t \geq \tau_G$ , we have that

$$\eta = \frac{2}{\pi_{\min}^*} \left[\frac{\ln(t)}{t}\right]^{\frac{1}{2}} \leq \frac{0.1378}{\ln\left(\frac{e}{\pi_{\min}^*}\right)} \leq 0.1378.$$

Thus we have  $\left[\frac{1+\eta}{1-\eta}\right]^2 \leq 1.7415 < 2$ , and  $\frac{1}{(1-\eta)^2} \leq 1.3452 < 1.5$ . On the other hand, notice that  $\ln\left(\frac{1}{1-\eta}\right) \leq 2\eta$  for  $0 \leq \eta \leq \frac{1}{2}$ , thus, for  $\eta \leq 0.1378$ , we have that

$$\left[\frac{1+\eta}{1-\eta}\right]^2 \ln\left(\frac{1}{1-\eta}\right) + \frac{4\eta}{(1-\eta)^2} \ln\left(\frac{e}{\pi_{\min}^*}\right) < 4\eta + 6\eta \ln\left(\frac{e}{\pi_{\min}^*}\right) = \left[4 + 6 \ln\left(\frac{e}{\pi_{\min}^*}\right)\right] \frac{2}{\pi_{\min}^*} \left[\frac{\ln(t)}{t}\right]^{\frac{1}{2}}.$$

Combining the above inequalities and the result of Lemma A-6, we have that

$$\begin{aligned} & \mathbb{E}_{T_t^g} \left\{ \mathbb{E}_{i \sim \pi^*} [N(T_t^g, i)] - \ln\left(\frac{e}{\pi_{\min}^*}\right) \mathbb{E}_{i \sim \pi^*} [N(T^*, i)] \right\} \\ & < \left[4 + 6 \ln\left(\frac{e}{\pi_{\min}^*}\right)\right] \frac{2}{\pi_{\min}^*} \left[\frac{\ln(t)}{t}\right]^{\frac{1}{2}} \mathbb{E}_{i \sim \pi^*} [N(T^*, i)] + \frac{2M|\mathcal{Q}|}{t^2}, \end{aligned}$$

for  $t \geq \tau_G$ . Q.E.D.

Finally, we prove Theorem 2.

### Proof of Theorem 2:

The proof is similar to Theorem 1. Specifically, for  $0 \leq \tau < \tau_G$ , we have that

$$\sum_{t=0}^{\tau} \mathbb{E}_{T_t^g} \left\{ \mathbb{E}_{i \sim \pi^*} [N(T_t^g, i)] - \ln\left(\frac{e}{\pi_{\min}^*}\right) \mathbb{E}_{i \sim \pi^*} [N(T^*, i)] \right\} \leq |\mathcal{Q}|(\tau + 1).$$

On the other hand, from Lemma A-7, for  $\tau \geq \tau_G$ , we have that

$$\begin{aligned} & \sum_{t=0}^{\tau} \mathbb{E}_{T_t^g} \left\{ \mathbb{E}_{i \sim \pi^*} [N(T_t^g, i)] - \ln\left(\frac{e}{\pi_{\min}^*}\right) \mathbb{E}_{i \sim \pi^*} [N(T^*, i)] \right\} \\ & = \sum_{t=0}^{\tau_G-1} \mathbb{E}_{T_t^g} \left\{ \mathbb{E}_{i \sim \pi^*} [N(T_t^g, i)] - \ln\left(\frac{e}{\pi_{\min}^*}\right) \mathbb{E}_{i \sim \pi^*} [N(T^*, i)] \right\} \\ & + \sum_{t=\tau_G}^{\tau} \mathbb{E}_{T_t^g} \left\{ \mathbb{E}_{i \sim \pi^*} [N(T_t^g, i)] - \ln\left(\frac{e}{\pi_{\min}^*}\right) \mathbb{E}_{i \sim \pi^*} [N(T^*, i)] \right\} \\ & \leq |\mathcal{Q}|\tau_G + \sum_{t=\tau_G}^{\tau} \mathbb{E}_{T_t^g} \left\{ \mathbb{E}_{i \sim \pi^*} [N(T_t^g, i)] - \ln\left(\frac{e}{\pi_{\min}^*}\right) \mathbb{E}_{i \sim \pi^*} [N(T^*, i)] \right\} \\ & \leq |\mathcal{Q}|\tau_G + \sum_{t=\tau_G}^{\tau} \left[ \left[8 + 12 \ln\left(\frac{e}{\pi_{\min}^*}\right)\right] \frac{1}{\pi_{\min}^*} \left[\frac{\ln(t)}{t}\right]^{\frac{1}{2}} \mathbb{E}_{i \sim \pi^*} [N(T^*, i)] + \frac{2M|\mathcal{Q}|}{t^2} \right], \end{aligned}$$

where the first inequality follows from the naive bound and the second inequality follows from Lemma A-7. Since  $\tau_G > 1$ , we have that

$$\sum_{t=\tau_G}^{\tau} \frac{1}{t^2} < \sum_{t=\tau_G}^{\infty} \frac{1}{t^2} < \sum_{t=\tau_G}^{\infty} \frac{1}{(t-1)t} = \sum_{t=\tau_G}^{\infty} \left[ \frac{1}{t-1} - \frac{1}{t} \right] = \frac{1}{\tau_G - 1}.$$

On the other hand, notice that  $\frac{\ln(t)}{t}$  is monotonically decreasing on interval  $[\tau_G - 1, \infty)$  (Since  $\tau_G - 1 \geq 3$ ), and the derivative of the function  $[t \ln(t)]^{\frac{1}{2}}$  is  $\frac{1}{2} \left[ \frac{1}{t \ln(t)} \right]^{\frac{1}{2}} + \frac{1}{2} \left[ \frac{\ln(t)}{t} \right]^{\frac{1}{2}}$ , we have that

$$\sum_{t=\tau_G}^{\tau} \left[ \frac{\ln(t)}{t} \right]^{\frac{1}{2}} < \int_{\tau_G-1}^{\tau} \left[ \frac{\ln(t)}{t} \right]^{\frac{1}{2}} dt < \int_{\tau_G-1}^{\tau} \left( \left[ \frac{\ln(t)}{t} \right]^{\frac{1}{2}} + \left[ \frac{1}{t \ln(t)} \right]^{\frac{1}{2}} \right) dt = 2 [\tau \ln(\tau)]^{\frac{1}{2}} - 2 [(\tau_G - 1) \ln(\tau_G - 1)]^{\frac{1}{2}}.$$

Thus, for  $\tau \geq \tau_G$ , we have that

$$\begin{aligned} & \sum_{t=0}^{\tau} \mathbb{E}_{T_t^g} \left\{ \mathbb{E}_{i \sim \pi^*} [N(T_t^g, i)] - \ln \left( \frac{e}{\pi_{\min}^*} \right) \mathbb{E}_{i \sim \pi^*} [N(T^*, i)] \right\} \\ & \leq |\mathcal{Q}| \tau_G + \sum_{t=\tau_G}^{\tau} \left[ \left[ 8 + 12 \ln \left( \frac{e}{\pi_{\min}^*} \right) \right] \frac{1}{\pi_{\min}^*} \left[ \frac{\ln(t)}{t} \right]^{\frac{1}{2}} \mathbb{E}_{i \sim \pi^*} [N(T^*, i)] + \frac{2M|\mathcal{Q}|}{t^2} \right] \\ & < |\mathcal{Q}| \tau_G + \left[ 16 + 24 \ln \left( \frac{e}{\pi_{\min}^*} \right) \right] \frac{\mathbb{E}_{i \sim \pi^*} [N(T^*, i)]}{\pi_{\min}^*} \left\{ [\tau \ln(\tau)]^{\frac{1}{2}} - [(\tau_G - 1) \ln(\tau_G - 1)]^{\frac{1}{2}} \right\} + \frac{2M|\mathcal{Q}|}{\tau_G - 1} \\ & = O \left( [\tau \ln(\tau)]^{\frac{1}{2}} \right). \end{aligned}$$

Notice that  $\ln \left( \frac{e}{\pi_{\min}^*} \right) \geq 1$ , so we have

$$\begin{aligned} & \sum_{t=0}^{\tau} \mathbb{E}_{T_t^g} \left\{ \mathbb{E}_{i \sim \pi^*} [N(T_t^g, i)] - \ln \left( \frac{e}{\pi_{\min}^*} \right) \mathbb{E}_{i \sim \pi^*} [N(T^*, i)] \right\} \\ & < |\mathcal{Q}| \tau_G + 40 \ln \left( \frac{e}{\pi_{\min}^*} \right) \frac{\mathbb{E}_{i \sim \pi^*} [N(T^*, i)]}{\pi_{\min}^*} \left\{ [\tau \ln(\tau)]^{\frac{1}{2}} - [(\tau_G - 1) \ln(\tau_G - 1)]^{\frac{1}{2}} \right\} + \frac{2M|\mathcal{Q}|}{\tau_G - 1} \\ & = O \left( [\tau \ln(\tau)]^{\frac{1}{2}} \right). \end{aligned}$$

Q.E.D.

## References

- [1] Daniel Golovin and Andreas Krause. Adaptive submodularity: Theory and applications in active learning and stochastic optimization. *Journal of Artificial Intelligence Research*, 42:427–486, 2011.
